# Supplementary material for: The genetics and evolution of eye color in domestic pigeons (Columba livia)
Source: PLoS Genet. 2021 Aug 30;17(8):e1009770. doi: 10.1371/journal.pgen.1009770 (PMC8432899; doi:10.1371/journal.pgen.1009770)
Supplement: S3 Table — (XLSX) [file pgen.1009770.s011.xlsx]

## Sheet: S3 Table
S3 Table. Differentially expressed genes from RNA-seq.
Gene name	Gene ID	BaseMean	log2FoldChange	lfcSE	Stat	Pvalue	Padj	Linkage group
A306_00006752	gene7399	184.07	-3.30275	0.239867	-13.7691	3.91e-43	5.5e-39	19
CX3CL1	gene12456	275.934	-1.4773	0.117782	-12.5427	4.36e-36	3.06e-32	14
SAAL1	gene4234	1999.02	-3.7486	0.333022	-11.2563	2.16e-29	1.01e-25	5
IL12RB1	gene12558	57.2555	-3.74589	0.356919	-10.4951	9.1e-26	3.2e-22	33
IFI35	gene12921	607.272	-1.61041	0.15879	-10.1418	3.6e-24	1.01e-20	Unknown
A306_00006751	gene7398	166.77	-2.45132	0.244819	-10.0128	1.34e-23	3.14e-20	19
STOM	gene8247	1966.14	-1.01359	0.104939	-9.65889	4.51e-22	9.05e-19	18
B2M	gene13418	28205.8	-1.88825	0.211711	-8.919	4.71e-19	7.35e-16	Unknown
DTX3L	gene4723	904.076	-1.60629	0.181182	-8.86565	7.61e-19	1.07e-15	6
IFIH1	gene3972	358.17	-2.27578	0.263392	-8.64028	5.61e-18	6.57e-15	6
IRF7	gene4181	897.479	-1.5872	0.184308	-8.6117	7.2e-18	7.78e-15	5
TAPBPL	gene3198	715.854	-1.36335	0.16101	-8.46749	2.51e-17	2.52e-14	1
IRF9	gene13007	406.459	-1.96505	0.234179	-8.39124	4.81e-17	4.31e-14	10
FAM26F	gene1037	432.069	-1.99893	0.238283	-8.38888	4.91e-17	4.31e-14	3
ACSL5	gene5138	215.885	-1.45602	0.174445	-8.34658	7.03e-17	5.81e-14	7
A306_00006290	gene7231	1766.3	-2.17944	0.263838	-8.26052	1.45e-16	1.13e-13	9
IRF1	gene11399	1787.66	-2.22876	0.276529	-8.05978	7.64e-16	5.65e-13	11
SAMD9L	gene2087	446.755	-2.75402	0.343849	-8.00939	1.15e-15	8.1e-13	2
PML	gene7424	472.078	-1.58802	0.199754	-7.94991	1.87e-15	1.25e-12	19
SERPING1	gene14292	370.662	-1.44075	0.182004	-7.91606	2.45e-15	1.5e-12	Unknown
PARP9	gene4724	624.551	-2.2284	0.285323	-7.81012	5.71e-15	3.35e-12	6
MOV10	gene9449	1504.02	-2.20294	0.285778	-7.70857	1.27e-14	7.15e-12	22
KIF18B	gene14794	60.6738	-1.7654	0.22974	-7.68436	1.54e-14	8.31e-12	Unknown
LYG2	gene1616	50.207	-3.96454	0.519371	-7.63333	2.29e-14	1.19e-11	1
RNF213	gene12829	3899.21	-2.70614	0.35523	-7.61798	2.58e-14	1.29e-11	9
SAMHD1	gene13088	1876.89	-2.35871	0.310482	-7.59694	3.03e-14	1.47e-11	10
NLRC5	gene12448	122.952	-2.79154	0.371004	-7.52429	5.3e-14	2.48e-11	14
OGFR	gene7677	1058.35	-1.59029	0.214559	-7.41188	1.25e-13	5.65e-11	10
A306_00015400	gene14967	2003.83	-1.82131	0.2474	-7.3618	1.81e-13	7.97e-11	Unknown
XAF1	gene9895	223.947	-1.87015	0.255714	-7.31347	2.6e-13	1.11e-10	30
MUC1	gene13276	374.933	-1.85801	0.254362	-7.3046	2.78e-13	1.15e-10	Unknown
DRAM1	gene3589	94.5557	-2.79402	0.386458	-7.22982	4.84e-13	1.84e-10	1
BCL2L14	gene3488	105.575	-3.22709	0.446102	-7.23397	4.69e-13	1.84e-10	1
STAT1	gene4093	4488.22	-1.72985	0.23919	-7.23213	4.75e-13	1.84e-10	6
A306_00007853	gene5732	519.095	-2.30713	0.321168	-7.18356	6.79e-13	2.51e-10	1
ARHGAP8	gene3470	97.4108	-1.62718	0.227626	-7.14848	8.77e-13	3.16e-10	1
A306_00010988	gene11405	500.21	-1.66237	0.237828	-6.98977	2.75e-12	9.21e-10	11
A306_00010989	gene11406	1550.95	-1.97836	0.282793	-6.99578	2.64e-12	9.21e-10	11
APOD	gene6085	69467.8	1.39455	0.199446	6.99215	2.71e-12	9.21e-10	12
ACSBG2	gene12428	257.901	-1.85512	0.266479	-6.96161	3.36e-12	1.1e-09	27
MAST3	gene12559	222.078	-1.8378	0.266209	-6.90362	5.07e-12	1.58e-09	33
PARP12	gene3595	461.879	-1.42718	0.207994	-6.86164	6.81e-12	2.08e-09	1
ST3GAL2L	gene12692	114.316	-1.48089	0.217413	-6.81139	9.67e-12	2.83e-09	10
EIF2AK2	gene9919	481.565	-2.20573	0.32551	-6.77624	1.23e-11	3.54e-09	3
ETV7	gene9410	149.43	-2.64944	0.395211	-6.70385	2.03e-11	5.71e-09	22
ZC3HAV1	gene3486	842.177	-1.40604	0.214512	-6.55462	5.58e-11	1.48e-08	1
C1S	gene3162	1039.52	-1.73182	0.264135	-6.55656	5.51e-11	1.48e-08	1
TOR1B	gene8349	2325.34	-1.11111	0.169627	-6.55031	5.74e-11	1.49e-08	18
A306_00012497	gene12506	1314.56	-1.75127	0.267883	-6.53745	6.26e-11	1.6e-08	12
AP3B2	gene7400	176.514	-2.26802	0.347346	-6.52957	6.6e-11	1.65e-08	19
MYD88	gene1922	308.492	-1.20985	0.185345	-6.52756	6.68e-11	1.65e-08	2
TRANK1	gene9592	1414.19	-1.22885	0.188761	-6.51008	7.51e-11	1.82e-08	2
EPSTI1	gene1800	360.525	-2.81178	0.432629	-6.49929	8.07e-11	1.83e-08	1
ZDHHC13	gene4344	479.595	-1.49523	0.230039	-6.49988	8.04e-11	1.83e-08	5
LY6E	gene16	19469.2	-1.40789	0.2166	-6.49995	8.03e-11	1.83e-08	2
ANO1	gene4353	171.303	2.00432	0.309261	6.48101	9.11e-11	2.03e-08	5
CLIC2	gene14525	514.196	-1.10945	0.171969	-6.45145	1.11e-10	2.4e-08	Unknown
NMI	gene4785	642.788	-1.17373	0.183648	-6.39119	1.65e-10	3.4e-08	6
IFIT5	gene9989	1858.48	-3.26248	0.512795	-6.36216	1.99e-10	4.05e-08	7
NFKBIZ	gene1601	364.613	-1.54514	0.246171	-6.27668	3.46e-10	6.94e-08	1
COMTD1	gene4965	671.851	-1.42851	0.22808	-6.26317	3.77e-10	7.47e-08	7
HELZ2	gene7634	2750.92	-1.80302	0.28873	-6.24467	4.25e-10	8.29e-08	10
SGMS2	gene6774	111.339	-1.34553	0.216077	-6.22709	4.75e-10	9.15e-08	4
CLDN1	gene11146	2416.54	-1.10038	0.177125	-6.21248	5.22e-10	9.77e-08	12
PRDM1	gene1088	84.9227	-1.97585	0.318199	-6.20947	5.32e-10	9.83e-08	3
A306_00015133	gene15138	75.0864	-2.01689	0.325527	-6.19578	5.8e-10	1.06e-07	Unknown
PHF11	gene1837	519.911	-1.11488	0.181146	-6.15458	7.53e-10	1.36e-07	1
A306_00013345	gene12806	237.615	-2.11143	0.343754	-6.14227	8.14e-10	1.45e-07	25
MKI67	gene5230	138.669	-1.99464	0.325138	-6.13475	8.53e-10	1.5e-07	7
A306_00015346	gene15367	8833.4	-1.86927	0.305226	-6.12421	9.11e-10	1.58e-07	Unknown
A306_00015227	gene14560	245.044	-2.75012	0.449999	-6.1114	9.88e-10	1.69e-07	Unknown
GZMA	gene7900	152.904	-4.47977	0.733569	-6.10681	1.02e-09	1.72e-07	Z
USP18	gene3573	1061.15	-1.82199	0.299029	-6.09302	1.11e-09	1.85e-07	1
TLR1A	gene2990	67.1915	-1.54749	0.254349	-6.08414	1.17e-09	1.94e-07	4
ZNFX1	gene8826	3487.12	-1.33422	0.219543	-6.07726	1.22e-09	2e-07	10
ANO9	gene14877	120	-1.27954	0.21154	-6.04868	1.46e-09	2.36e-07	Unknown
C15ORF48	gene5478	167.171	-2.26258	0.375029	-6.03308	1.61e-09	2.54e-07	19
TRIM47	gene7253	499.122	-1.45978	0.242409	-6.02197	1.72e-09	2.69e-07	9
IFI6	gene514	3605.26	-4.63665	0.771325	-6.01128	1.84e-09	2.84e-07	2
PTPRZ1	gene3940	314.522	-1.39365	0.233651	-5.96465	2.45e-09	3.7e-07	1
NOX1	gene8054	186.632	-1.40744	0.237037	-5.93762	2.89e-09	4.32e-07	15
CASP7	gene5144	652.049	-1.26816	0.213963	-5.92699	3.09e-09	4.56e-07	7
CCR5	gene2285	118.951	-1.94047	0.327824	-5.91924	3.23e-09	4.73e-07	2
PCOLCE2	gene6065	158.153	1.08592	0.184019	5.90113	3.61e-09	5.23e-07	12
PLXNC1	gene10493	267.005	-1.49248	0.253687	-5.88314	4.03e-09	5.77e-07	1
DHX58	gene13703	561.57	-1.89349	0.322407	-5.87299	4.28e-09	6.08e-07	29
ADGRF5	gene1338	1531.93	-1.32379	0.226123	-5.85431	4.79e-09	6.67e-07	3
PARP14	gene4721	917.831	-1.79089	0.307638	-5.82141	5.84e-09	7.96e-07	6
SPI1	gene2330	216.676	-1.31468	0.226275	-5.81009	6.24e-09	8.44e-07	5
TMEM140	gene3672	780.241	-1.41158	0.243022	-5.80843	6.31e-09	8.44e-07	1
LCP2	gene6425	135.393	-1.84475	0.318944	-5.78391	7.3e-09	9.59e-07	11
C1R	gene3161	1115.18	-1.00758	0.17511	-5.754	8.72e-09	1.12e-06	1
A306_00014351	gene13767	111.912	-1.26661	0.22039	-5.74713	9.08e-09	1.16e-06	Unknown
CNP	gene13699	431.619	-1.21359	0.211237	-5.74515	9.18e-09	1.16e-06	29
CD8A	gene2849	53.1933	-2.82341	0.496376	-5.68804	1.29e-08	1.57e-06	4
Mx1	gene1386	6607.38	-3.10904	0.547021	-5.6836	1.32e-08	1.6e-06	1
PLAC8L1	gene4568	2813.75	-1.94161	0.341955	-5.67799	1.36e-08	1.62e-06	4
PBK	gene14272	155.582	-1.85306	0.330361	-5.6092	2.03e-08	2.3e-06	Unknown
SLC16A3	gene13071	191.244	-1.44291	0.257445	-5.60471	2.09e-08	2.35e-06	9
A306_00008533	gene8894	104.194	-2.02856	0.364705	-5.56218	2.66e-08	2.95e-06	25
A306_00013895	gene13478	118.254	-4.96395	0.897511	-5.5308	3.19e-08	3.5e-06	34
CDS1	gene4577	218.676	-1.37998	0.251902	-5.47822	4.3e-08	4.47e-06	4
A306_00000328	gene14886	138.976	-1.83514	0.336298	-5.45688	4.85e-08	4.98e-06	Unknown
A306_00014990	gene14240	394.663	-1.30398	0.240381	-5.42463	5.81e-08	5.83e-06	Unknown
CD74	gene6534	22395.4	-1.89783	0.350986	-5.40713	6.4e-08	6.34e-06	11
NCF1	gene8949	176.302	-1.39638	0.259362	-5.38393	7.29e-08	7.11e-06	25
ATP13A4	gene12519	592.213	-1.37298	0.255451	-5.37472	7.67e-08	7.43e-06	12
MYO15L	gene7264	196.146	-2.05624	0.382787	-5.37178	7.8e-08	7.45e-06	9
RNF216	gene9171	853.715	-1.33312	0.248151	-5.37219	7.78e-08	7.45e-06	13
HCLS1	gene13098	215.839	-1.14732	0.213801	-5.3663	8.04e-08	7.63e-06	Unknown
HCK	gene13002	110.2	-1.98913	0.371715	-5.35124	8.74e-08	8.24e-06	10
LY6E	gene13	199.916	-2.2246	0.418078	-5.32103	1.03e-07	9.57e-06	2
A306_00015228	gene15277	1009.67	-2.15501	0.408736	-5.27238	1.35e-07	1.23e-05	Unknown
NOXO1	gene11281	54.4176	-2.94755	0.562824	-5.23707	1.63e-07	1.46e-05	13
SRGN	gene5063	279.608	-1.45061	0.277042	-5.23605	1.64e-07	1.46e-05	7
ADGRF4	gene1335	145.654	1.48772	0.284587	5.22766	1.72e-07	1.51e-05	3
CLDN23	gene10091	105.352	-1.24903	0.240634	-5.19059	2.1e-07	1.79e-05	4
MTMR9LP	gene12846	90.3902	-1.04864	0.202147	-5.18749	2.13e-07	1.8e-05	Unknown
SCNN1A	gene3197	182.65	-1.41047	0.272717	-5.17192	2.32e-07	1.95e-05	1
PLSCR1	gene6072	379.15	-1.10708	0.214185	-5.1688	2.36e-07	1.97e-05	12
GABRA5	gene3293	81.6879	1.20103	0.233045	5.15363	2.55e-07	2.11e-05	1
LITAF	gene8175	716.32	-1.07617	0.209016	-5.14874	2.62e-07	2.16e-05	13
C1QA	gene12103	376.556	-1.18362	0.23186	-5.10488	3.31e-07	2.63e-05	21
A306_00000055	gene14830	100.575	-1.29042	0.253194	-5.09659	3.46e-07	2.73e-05	Unknown
CDH4	gene7695	263.385	1.02831	0.201871	5.09392	3.51e-07	2.75e-05	10
CALCB	gene4252	124.477	-1.97704	0.388945	-5.0831	3.71e-07	2.9e-05	5
ANGPTL4	gene13764	357.28	1.00258	0.197316	5.08106	3.75e-07	2.91e-05	Unknown
C8ORF4	gene13349	70.6719	1.68268	0.33376	5.04159	4.62e-07	3.51e-05	Unknown
CSF2RB	gene3834	115.299	-1.71628	0.342886	-5.00539	5.57e-07	4.17e-05	1
KPNA2	gene7222	124.815	-2.2948	0.459036	-4.99917	5.76e-07	4.28e-05	9
ITGB2	gene10178	248.59	-1.72047	0.344319	-4.99673	5.83e-07	4.31e-05	6
A306_00013346	gene12807	103.455	-3.04658	0.610239	-4.99244	5.96e-07	4.39e-05	25
CMPK2	gene1258	673.711	-2.77334	0.557145	-4.97776	6.43e-07	4.71e-05	3
TNFRSF14	gene8399	115.148	-1.08017	0.218811	-4.93654	7.95e-07	5.7e-05	21
NQO2	gene653	66.5074	-1.37388	0.27881	-4.92764	8.32e-07	5.85e-05	2
CD244	gene6298	390.986	-1.68032	0.341989	-4.91336	8.95e-07	6.23e-05	15
TMEM173	gene12109	54.7131	-1.54769	0.316177	-4.89501	9.83e-07	6.71e-05	11
EVA1A	gene1332	173.821	1.08542	0.221903	4.8914	1e-06	6.8e-05	3
A306_00014207	gene14015	56.0894	-2.47045	0.50564	-4.88579	1.03e-06	6.96e-05	Unknown
ABCG2	gene10896	787.006	1.02794	0.211577	4.85847	1.18e-06	7.84e-05	7
LYG2	gene1615	1137.74	-1.26325	0.260465	-4.84999	1.23e-06	8.15e-05	1
MPEG1	gene15148	577.027	-1.0193	0.210452	-4.84341	1.28e-06	8.38e-05	Unknown
N4BP2L1	gene5661	142.841	-1.05859	0.218794	-4.83831	1.31e-06	8.52e-05	1
UBE2C	gene14838	61.2837	-1.85437	0.384	-4.82909	1.37e-06	8.86e-05	10
KIF11	gene10882	122.4	-1.56692	0.324554	-4.82793	1.38e-06	8.86e-05	7
PARP14	gene4722	1783.57	-1.65689	0.343267	-4.82681	1.39e-06	8.86e-05	6
LAMP3	gene6135	61.2149	-2.71269	0.562442	-4.82307	1.41e-06	8.99e-05	12
BUB1B	gene12299	138.739	-1.18876	0.247396	-4.80508	1.55e-06	9.77e-05	5
DDX60	gene12166	171.309	-3.94498	0.821535	-4.80197	1.57e-06	9.77e-05	44
PINLYP	gene10754	205.655	-1.43297	0.298418	-4.80189	1.57e-06	9.77e-05	Z
LY6E	gene14	353.567	-3.14923	0.655951	-4.80102	1.58e-06	9.77e-05	2
LCP1	gene1818	500.936	-1.54804	0.322417	-4.80136	1.58e-06	9.77e-05	1
OTOR	gene6656	1128.19	1.2978	0.270787	4.7927	1.65e-06	0.000101431	3
IRF8	gene9361	320.436	-2.05743	0.430584	-4.77823	1.77e-06	0.000108062	14
CKS1B	gene13267	74.8625	-1.52993	0.320458	-4.7742	1.8e-06	0.00010977	Unknown
TRIM25	gene7248	400.784	-1.11659	0.234284	-4.76595	1.88e-06	0.000113867	9
A306_00007619	gene6283	1101.41	-1.96651	0.412816	-4.76364	1.9e-06	0.000114683	15
RSAD2	gene1259	346.564	-3.17961	0.669336	-4.75038	2.03e-06	0.00012194	3
TOP2A	gene13324	215.5	-2.00658	0.422619	-4.74796	2.05e-06	0.000122883	29
LYPD1	gene4746	60.7934	-1.1127	0.234794	-4.73905	2.15e-06	0.00012733	6
FGFBP1	gene2946	2312.16	-1.07019	0.226342	-4.72819	2.27e-06	0.000133767	4
A306_00014567	gene14455	154.481	-1.42554	0.301809	-4.7233	2.32e-06	0.000135882	Unknown
CTSS	gene13485	1143.19	-1.19401	0.253003	-4.71932	2.37e-06	0.000137991	34
ARHGAP30	gene13389	108.021	-1.62499	0.344491	-4.71708	2.39e-06	0.000138946	Unknown
SLC6A14	gene8092	591.782	-1.67744	0.356965	-4.69917	2.61e-06	0.000150459	15
MGAT1	gene15214	247.359	-1.02276	0.217898	-4.69375	2.68e-06	0.000153245	Unknown
PLAC8L1	gene4567	299.85	-2.24316	0.478016	-4.69264	2.7e-06	0.000153456	4
DLGAP5	gene11049	81.3601	-1.61464	0.347206	-4.65038	3.31e-06	0.000183324	5
SLITRK3	gene9032	96.0572	1.25052	0.269538	4.63951	3.49e-06	0.000191724	12
CPAMD8	gene12548	11446.1	1.14909	0.248536	4.62344	3.77e-06	0.0002056	33
TMEM106A	gene12916	95.8104	-1.4277	0.309733	-4.60946	4.04e-06	0.00021656	Unknown
MUC13	gene4712	107.529	-3.80001	0.824815	-4.6071	4.08e-06	0.000218197	6
CYBB	gene7797	381.486	-1.41474	0.307734	-4.59728	4.28e-06	0.000227872	1
APOBEC1	gene10031	708.981	-3.61278	0.787897	-4.58534	4.53e-06	0.000239471	1
SEPT2	gene12648	60.5593	-1.00667	0.220758	-4.56007	5.11e-06	0.000267171	Unknown
PLK1	gene10393	58.7854	-1.8868	0.415391	-4.54221	5.57e-06	0.000286572	13
CDCA7	gene4026	54.372	-1.35613	0.299528	-4.52756	5.97e-06	0.000302739	6
GJB2	gene5719	110.914	-1.29289	0.285877	-4.52253	6.11e-06	0.000306708	1
ASL2	gene8871	69.1329	-1.90536	0.422657	-4.50806	6.54e-06	0.000326043	25
BLVRA	gene7993	475.054	1.13062	0.250985	4.50471	6.65e-06	0.000330071	2
C1QB	gene12101	233.593	-1.2162	0.27036	-4.49845	6.85e-06	0.000337554	21
UBE2L6	gene14291	509.172	-1.86551	0.415098	-4.49415	6.98e-06	0.000343239	Unknown
NCAPG	gene2956	63.4198	-1.90572	0.42412	-4.49336	7.01e-06	0.000343314	4
CCDC80	gene1550	902.735	1.005	0.223823	4.49013	7.12e-06	0.00034734	1
TLR7	gene3352	58.0393	-1.29684	0.291317	-4.45166	8.52e-06	0.000401854	1
AURKB	gene11064	100.38	-1.94864	0.438826	-4.44058	8.97e-06	0.000420295	17
A306_00000298	gene15297	59.4256	-1.12828	0.254918	-4.42606	9.6e-06	0.000447214	Unknown
A306_00007620	gene6284	496.53	-1.80599	0.408062	-4.42577	9.61e-06	0.000447214	15
A306_00000114	gene14363	770.439	-1.75768	0.397252	-4.4246	9.66e-06	0.000448159	Unknown
PCDH10	gene4625	108.558	1.18216	0.268342	4.40544	1.06e-05	0.000478602	4
A306_00010654	gene10424	430.616	1.54867	0.353393	4.38229	1.17e-05	0.000523968	11
HIST1H101	gene3694	101.695	-1.06325	0.242766	-4.37973	1.19e-05	0.000528478	1
A306_00014857	gene15036	4135.45	-2.95709	0.67715	-4.36696	1.26e-05	0.0005568	Unknown
WIF1	gene3861	1265.81	1.11323	0.255085	4.36413	1.28e-05	0.000560829	1
ALOX5AP	gene5667	98.8186	-1.3632	0.313291	-4.35122	1.35e-05	0.000589066	1
FYB	gene11209	64.3477	-1.708	0.393117	-4.34476	1.39e-05	0.000604785	Z
CDK1	gene5028	88.4728	-2.12819	0.490973	-4.33463	1.46e-05	0.000629433	7
CSF2RA	gene3315	74.4685	-1.31778	0.304186	-4.33216	1.48e-05	0.000634596	1
ARHGAP45	gene14076	264.939	-1.29299	0.302608	-4.27283	1.93e-05	0.000792235	Unknown
FMNL1	gene12779	206.329	-1.21994	0.285975	-4.26588	1.99e-05	0.000811117	Unknown
HACD4	gene11877	100.288	-1.10027	0.258558	-4.25541	2.09e-05	0.00084513	Z
MMP7	gene5762	171.643	-3.62852	0.852897	-4.25434	2.1e-05	0.000846731	1
GPR39	gene4745	111.774	-1.2045	0.283978	-4.24151	2.22e-05	0.000883923	6
CYSLTR2	gene1831	130.573	-1.03214	0.244378	-4.22352	2.41e-05	0.000941553	1
FAS	gene9985	282.31	-1.14945	0.272485	-4.21839	2.46e-05	0.000957897	7
A306_00015197	gene14803	1047.45	-2.3096	0.549719	-4.20142	2.65e-05	0.0010241	Unknown
APBB1IP	gene2011	89.0917	-1.09182	0.260428	-4.19241	2.76e-05	0.0010512	2
KIF23	gene5626	148.039	-1.3723	0.328141	-4.18206	2.89e-05	0.00108847	19
A306_00013395	gene12785	56.5261	-1.24181	0.297737	-4.17081	3.04e-05	0.00113447	22
IL7R	gene12004	71.552	-1.90332	0.45673	-4.16729	3.08e-05	0.00114516	42
IKBKE	gene9488	629.791	-1.02425	0.245809	-4.16686	3.09e-05	0.00114516	22
STAT4	gene4094	62.992	-1.78429	0.429302	-4.15625	3.24e-05	0.00119333	6
ASS1	gene8340	1362.44	-2.10475	0.508341	-4.14042	3.47e-05	0.00124967	18
NGEF	gene11246	156.487	1.02543	0.247738	4.13919	3.49e-05	0.00125279	12
CENPF	gene6301	64.2946	-1.19298	0.290383	-4.10829	3.99e-05	0.00140752	3
NOS2	gene9882	164.581	-1.76171	0.429554	-4.10125	4.11e-05	0.00144377	30
TK1	gene13044	104.926	-1.3942	0.340633	-4.09297	4.26e-05	0.00148153	9
FKBP11	gene13816	157.255	-1.23228	0.301366	-4.08898	4.33e-05	0.00150349	Unknown
ANKK1	gene12085	100.28	1.04241	0.255454	4.08061	4.49e-05	0.00155489	16
SLBP	gene2869	57.0408	-1.57554	0.387669	-4.06413	4.82e-05	0.00164456	4
A306_00013683	gene13524	314.37	-1.25215	0.30874	-4.05567	5e-05	0.00168888	34
GCH1	gene11054	152.776	-1.83866	0.454321	-4.04704	5.19e-05	0.00173153	5
FRK	gene1041	120.968	-1.17529	0.290659	-4.04354	5.26e-05	0.00174927	3
VAV1	gene14582	67.9692	-1.47195	0.364332	-4.04012	5.34e-05	0.00177078	Unknown
IRF5	gene10256	57.5903	-1.13019	0.279872	-4.03826	5.38e-05	0.00178069	1
NCAPH	gene13570	90.644	-1.16302	0.288044	-4.03764	5.4e-05	0.00178125	Unknown
PTPRC	gene5292	494.386	-1.36881	0.340416	-4.021	5.8e-05	0.00190734	8
VNN1	gene964	349.083	-2.55313	0.635091	-4.02011	5.82e-05	0.00190969	3
OSMR	gene11207	92.1386	-1.37195	0.34143	-4.01824	5.86e-05	0.00191198	Z
CSF3R	gene11828	60.834	-1.00469	0.250488	-4.01092	6.05e-05	0.00196351	23
EDA2R	gene11891	55.3787	-1.38582	0.346028	-4.00494	6.2e-05	0.00199958	15
MSMP	gene14583	739.029	1.42579	0.355956	4.00552	6.19e-05	0.00199958	Unknown
ARHGAP25	gene13492	68.8526	-1.37994	0.346044	-3.98776	6.67e-05	0.0021256	39
MCM3	gene1366	208.411	-1.63056	0.409094	-3.98578	6.73e-05	0.00213862	3
ITGA4	gene4064	106.84	-1.28279	0.324248	-3.95621	7.61e-05	0.00238352	6
SOCS3	gene13041	174.856	-1.33639	0.337983	-3.95402	7.68e-05	0.0024001	9
P3H2	gene11145	186.419	1.03898	0.263434	3.94399	8.01e-05	0.00246986	12
FAM46A	gene1159	158.358	-1.02546	0.260497	-3.93656	8.27e-05	0.0025322	3
MARCO	gene4735	1085.15	-1.20031	0.305086	-3.93434	8.34e-05	0.00254879	6
IGLL1	gene6877	24814.4	-4.25888	1.08505	-3.92507	8.67e-05	0.00263188	20
IL2RG	gene8110	198.113	-1.35128	0.344517	-3.92226	8.77e-05	0.00265134	15
RAC2	gene3825	103.229	-1.51797	0.389537	-3.89685	9.75e-05	0.00289554	1
CD3D	gene12088	106.886	-1.88797	0.485142	-3.89158	9.96e-05	0.00294677	16
IRF4	gene651	70.9182	-3.89305	1.0068	-3.86674	0.0001103	0.00318308	2
A306_00000124	gene14691	165.102	1.91471	0.496451	3.8568	0.000114883	0.00328831	Unknown
NECAB1	gene192	116.01	1.14314	0.296645	3.85355	0.000116419	0.00332551	2
FAM3B	gene1387	231.924	-1.09449	0.285851	-3.82888	0.000128726	0.00361293	1
IMPA2	gene459	253.793	1.13393	0.296161	3.82875	0.000128795	0.00361293	2
A306_00014134	gene12734	50.6251	-1.20827	0.316182	-3.82145	0.00013267	0.00369951	10
KRT19	gene13307	137.569	-3.53093	0.926066	-3.81283	0.000137387	0.00379581	29
JCHAIN	gene12035	13141.9	-4.10234	1.07664	-3.81031	0.000138795	0.00382477	4
CHRNA4	gene7664	122.234	1.03427	0.271986	3.80267	0.000143147	0.0039064	10
PADI3	gene8562	294.655	-1.31601	0.348227	-3.77918	0.000157347	0.00419613	21
A306_00009358	gene7178	59.9755	-1.05791	0.280073	-3.77726	0.00015856	0.00422046	14
A306_00015260	gene15321	909.516	-1.50783	0.40137	-3.7567	0.000172171	0.00451436	Unknown
ERI2	gene10353	55.8033	-1.34154	0.359417	-3.73255	0.000189552	0.00489699	13
A306_00009048	gene6596	2292.64	2.95739	0.794105	3.72418	0.000195949	0.0050437	17
DDX58	gene7816	1599.31	-2.46109	0.661968	-3.71784	0.000200936	0.00511586	Z
CCR5	gene2284	58.3774	-1.87342	0.504948	-3.71012	0.000207158	0.00524575	2
CIITA	gene8168	65.3104	-2.30635	0.621633	-3.71014	0.000207143	0.00524575	13
LACC1	gene1804	323.679	-1.12331	0.302724	-3.71066	0.000206719	0.00524575	1
MZB1	gene11527	220.658	-4.03274	1.09246	-3.69142	0.000223005	0.00556681	11
CASC5	gene12284	84.4331	-1.13521	0.310283	-3.65864	0.000253561	0.00626283	5
SCN4B	gene14746	91.3376	1.35436	0.371673	3.64395	0.000268484	0.00658512	Unknown
SLC5A8	gene12210	117.124	-1.24658	0.34265	-3.63805	0.000274708	0.00669106	1
PRPS2	gene3351	50.9358	1.19154	0.328049	3.6322	0.000281019	0.00679586	1
CCNB3	gene14523	91.9002	-1.83255	0.50706	-3.61407	0.000301424	0.00720445	Unknown
HJURP	gene3279	55.5531	-1.55435	0.430419	-3.61124	0.000304741	0.00725904	1
ZAP70	gene12435	50.1364	-1.40849	0.390256	-3.60915	0.000307206	0.0073037	27
VDR	gene13893	63.8603	-1.33071	0.369987	-3.59662	0.000322373	0.00760512	Unknown
A306_00014500	gene14362	85.5247	-2.17737	0.605283	-3.59727	0.000321577	0.00760512	Unknown
PIK3R6	gene12605	69.9	-1.46723	0.408746	-3.58958	0.000331212	0.00776693	9
A306_00014690	gene14488	168.968	-1.05203	0.293902	-3.57953	0.000344213	0.00800904	Unknown
DOCK2	gene6422	71.9332	-1.56859	0.43874	-3.57522	0.00034994	0.00806239	11
LCNL1	gene14521	2743.76	-2.54867	0.716339	-3.55791	0.000373813	0.00847349	Unknown
GGT1	gene9711	80.4046	-1.28248	0.361175	-3.55087	0.000383958	0.00862005	20
NEK2	gene6322	127.966	-1.28442	0.362544	-3.54281	0.000395891	0.00881753	3
CENPN	gene9327	55.9151	-1.30153	0.369313	-3.5242	0.000424766	0.00926165	14
A306_00011588	gene11441	232.851	1.04004	0.295129	3.52402	0.000425058	0.00926165	3
HMMR	gene6435	62.0242	-1.44633	0.411034	-3.51875	0.000433585	0.00938923	11
VIT	gene9915	58.7003	-3.53845	1.00697	-3.51397	0.00044147	0.00948688	3
PTTG1	gene6443	60.2046	-1.43244	0.410575	-3.48887	0.000485075	0.0101146	11
ACKR4	gene2276	202.005	-1.08772	0.312099	-3.48519	0.000491793	0.0102395	2
ANLN	gene9602	57.6038	-1.47047	0.42315	-3.47507	0.000510728	0.0105246	2
AKR1D1	gene3604	59.5648	1.17446	0.339831	3.456	0.000548254	0.0109908	1
HERC4	gene10074	1260.81	-1.95856	0.566774	-3.45564	0.000548991	0.0109908	4
CACNA2D4	gene3558	109.941	1.02231	0.297337	3.43823	0.000585538	0.0115578	1
CDCA2	gene11341	74.407	-1.00934	0.293659	-3.43713	0.000587923	0.0115886	24
CDC20	gene5784	105.078	-1.2889	0.375318	-3.43415	0.000594406	0.0116673	8
NFAM1	gene3731	100.255	-1.00922	0.295024	-3.42081	0.00062436	0.0121703	1
FCHO1	gene13877	50.3943	-1.08699	0.318501	-3.41284	0.000642886	0.0124451	Unknown
RGS18	gene5272	136.354	-1.22072	0.357748	-3.41224	0.000644325	0.0124558	8
TBX3	gene9641	95.2127	1.03776	0.304814	3.40456	0.000662706	0.0127584	20
COL20A1	gene7665	187.37	-1.20738	0.355456	-3.39671	0.000682002	0.0130656	10
IKZF3	gene13631	51.8735	-1.56075	0.46045	-3.38961	0.000699922	0.0133108	Unknown
XKR5	gene1370	154.838	1.13596	0.335717	3.38369	0.000715196	0.0135254	3
CKAP2	gene1859	85.8313	-1.38546	0.409959	-3.3795	0.000726178	0.013644	1
RGS1	gene5274	195.49	-1.47291	0.436757	-3.37239	0.000745197	0.0138532	8
HAAO	gene6344	78.1134	-1.38372	0.411446	-3.36308	0.000770779	0.0141973	3
ORC1	gene5979	52.713	-1.08818	0.323733	-3.36136	0.00077561	0.0142623	8
FOXA1	gene2529	77.1438	-1.14019	0.33923	-3.3611	0.000776341	0.0142623	5
MYO1F	gene12433	311.324	-1.03922	0.311832	-3.33264	0.000860259	0.01552	27
PARP8	gene7916	75.5664	-1.53589	0.462875	-3.31816	0.000906135	0.0162424	Z
CR1	gene9464	1663.35	-1.18567	0.360139	-3.29225	0.000993892	0.0175259	22
BUB1	gene6724	76.8931	-1.54567	0.470194	-3.2873	0.00101151	0.0176915	3
RLBP1	gene5534	2627.02	1.10383	0.336499	3.28034	0.00103682	0.0180341	19
KLHL6	gene11220	58.2957	-1.04157	0.318578	-3.26944	0.00107761	0.0185627	12
FAM19A1	gene6587	70.1977	1.07248	0.328428	3.26549	0.00109273	0.0187512	17
A306_00000302	gene15093	2092.27	1.02568	0.314941	3.25672	0.00112707	0.019107	Unknown
KNTC1	gene7002	87.4954	-1.18117	0.363137	-3.25268	0.00114321	0.0193341	20
NABP1	gene4098	90.9636	-1.44256	0.443728	-3.251	0.00115001	0.0193807	6
DOCK2L	gene14106	55.7321	-1.03663	0.320088	-3.23857	0.0012013	0.0200751	Unknown
ASPM	gene5285	103.209	-1.22611	0.378813	-3.23671	0.00120918	0.0201422	8
CH25H	gene9986	290.015	-1.02518	0.316908	-3.23494	0.00121668	0.0202119	7
CD3E	gene12089	88.3772	-1.44852	0.451759	-3.20639	0.00134412	0.021763	16
A306_00015335	gene14923	63.9237	-1.05218	0.330217	-3.18631	0.00144098	0.022987	Unknown
CD2	gene1475	137.817	-1.24012	0.389333	-3.18525	0.00144631	0.0230459	1
SOCS1	gene8171	157.537	-1.48436	0.468109	-3.17097	0.00151929	0.0239859	13
ABCA12	gene4123	180.5	1.14526	0.361487	3.16819	0.00153391	0.0241406	6
A306_00013887	gene13469	206.275	3.01775	0.955185	3.15933	0.0015813	0.0246654	34
TNFRSF17	gene11933	139.784	-2.40758	0.763712	-3.15247	0.00161895	0.025058	13
HAPLN4	gene12361	65.8594	1.15416	0.36961	3.12265	0.00179228	0.0269605	33
PRC1	gene9650	58.4543	-1.24605	0.400875	-3.10832	0.00188154	0.0278056	20
MCM2	gene10726	359.028	-1.01095	0.327717	-3.08481	0.00203681	0.0297561	17
A306_00003615	gene3143	171.181	-2.06333	0.669537	-3.08172	0.00205806	0.0300042	1
KIF4A	gene11742	90.1139	-1.53836	0.500836	-3.07159	0.00212923	0.0307546	15
A306_00009961	gene10140	53.8668	-1.24827	0.407761	-3.06128	0.00220391	0.0315736	6
E2F1	gene8757	62.6341	-1.37923	0.456863	-3.01892	0.0025368	0.034821	10
IKZF1	gene571	93.7562	-1.20405	0.39948	-3.01405	0.00257787	0.0351551	2
CORIN	gene3029	70.2222	1.13694	0.37894	3.00033	0.00269688	0.0363742	4
MIS12	gene8930	58.4646	-1.09034	0.365601	-2.98234	0.00286057	0.0378555	25
PIK3R5	gene12604	93.7724	-1.18911	0.403766	-2.94504	0.00322911	0.0414825	9
A306_00012902	gene13145	76.6931	-1.61201	0.548205	-2.94053	0.00327654	0.0419385	35
C3AR1	gene10036	70.8537	-1.01137	0.345905	-2.92382	0.00345759	0.0436847	1
A306_00008692	gene9729	196.336	-4.14399	1.42163	-2.91495	0.00355741	0.0443226	20
CGTL	gene3606	264.737	1.00657	0.346751	2.90286	0.00369773	0.0456259	1
A306_00000949	gene1168	159.71	-2.14207	0.744364	-2.87772	0.0040056	0.0483671	3
